# Supplementary material
Source: PubMed Central journal article supplement (PMC4396048)
Supplement: ajcr0005-0702-f5.pdf [file ajcr0005-0702-f5.pdf]

# Dynamin2 inhibits HCC invasion via EGFR endocytosis

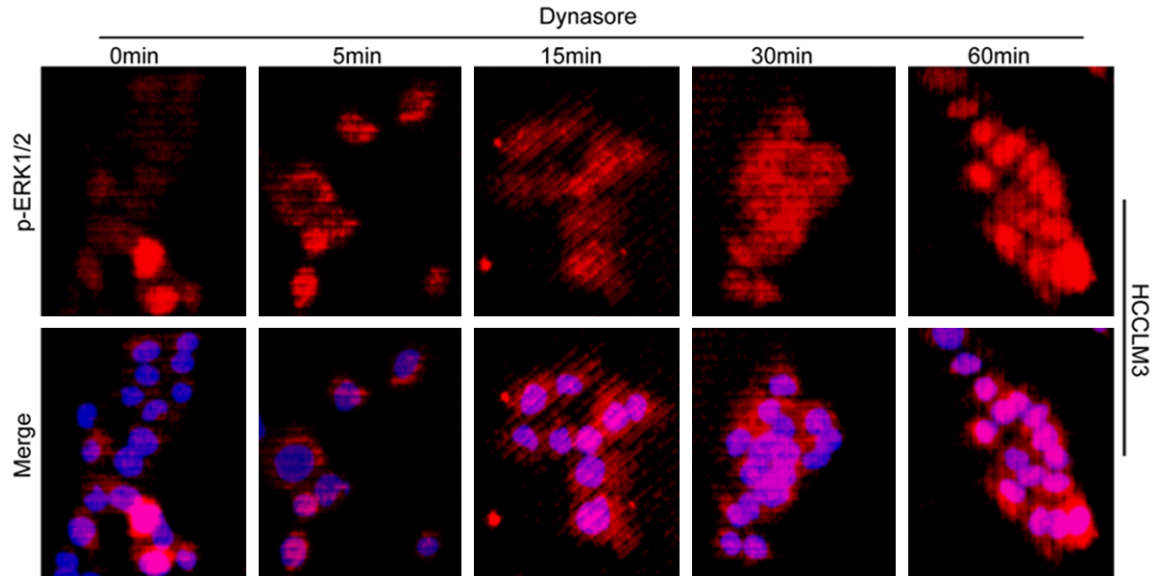

**Supplementary Figure 1.** HCCLM3 cells were pre-treated with 50  $\mu$ M Dynasore inhibitor for 30 min; then cells were then fixed and immunostained with rabbit anti-p-ERK1/2 antibody. Cells were analysed by microscopy. Bar 50  $\mu$ m.
